# Supplementary material
Source: Springer Nature journal article supplement (https://www.springermedizin.de/resource/supplementary/12889_2009_1610_MOESM1_ESM.pdf/9503542)

## Intervention Communities

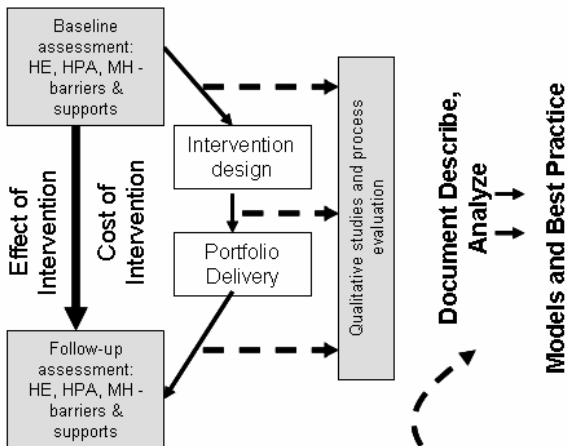

**Compare Follow-up – Baselines in Intervention and Control and costs**

**Evidence of Effectiveness and Cost effectiveness**

## Control Communities

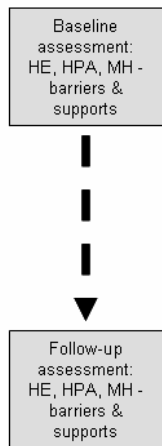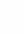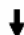

Supplement: MOESM1 [file 9503542]
